# Supplementary material
Source: MDPI journal article supplement (https://www.mdpi.com/2311-7524/7/10/381)
Supplement: s1 [file s1]

**Table S1.** Sequences of primers used in qPCR.

| <b>Gene</b>    | <b>Forward Primer (5'to 3')</b> | <b>Reverse Primer (5'to 3')</b> |
|----------------|---------------------------------|---------------------------------|
| <i>AcLOX1</i>  | TCGGGTCAGAGATCAAAAGC            | GAAGCCTACGAGACAATCCATCAT        |
| <i>AcLOX2</i>  | TGCCTTACACACTGCTATTTCC          | CTTTTTCATTTGGGATGTCGTT          |
| <i>AcLOX3</i>  | GTTAGTGCCACGGGCACGT             | CATACATGTTCTCGACGATAGAGTT       |
| <i>AcLOX4</i>  | GAGAAGGGAGTGTTTACGTG            | AACGGAGTATTAAATTGTGCTTGTT       |
| <i>AcLOX5</i>  | AGTGAATGTGCCATACACTTT           | ACGAAACCGGAAACCCTTAGA           |
| <i>AcLOX6</i>  | GGGTTGTACCCTATGAGCTTTT          | ATGCGTAAACACACTCGCTTCTC         |
| <i>AcHPL</i>   | GAGTCAACCCCAACGTCATCG           | CTCGGAGGTATCCAAATACGCACA        |
| <i>AcADH</i>   | GATCAACCCTGCTGCTCCACT           | CCGACCGCTCCCAATCCAAA            |
| <i>AcAAT</i>   | GAAATGTCTTTGCCCTTCCG            | CGCTATCTAAAACCCACCCC            |
| <i>AcActin</i> | GCTTACAGAGGCACCACTCAA           | CCGGAATCCAGCACAATACCAG          |
