# Supplementary material
Source: MDPI journal article supplement (https://www.mdpi.com/2311-7524/7/10/381)

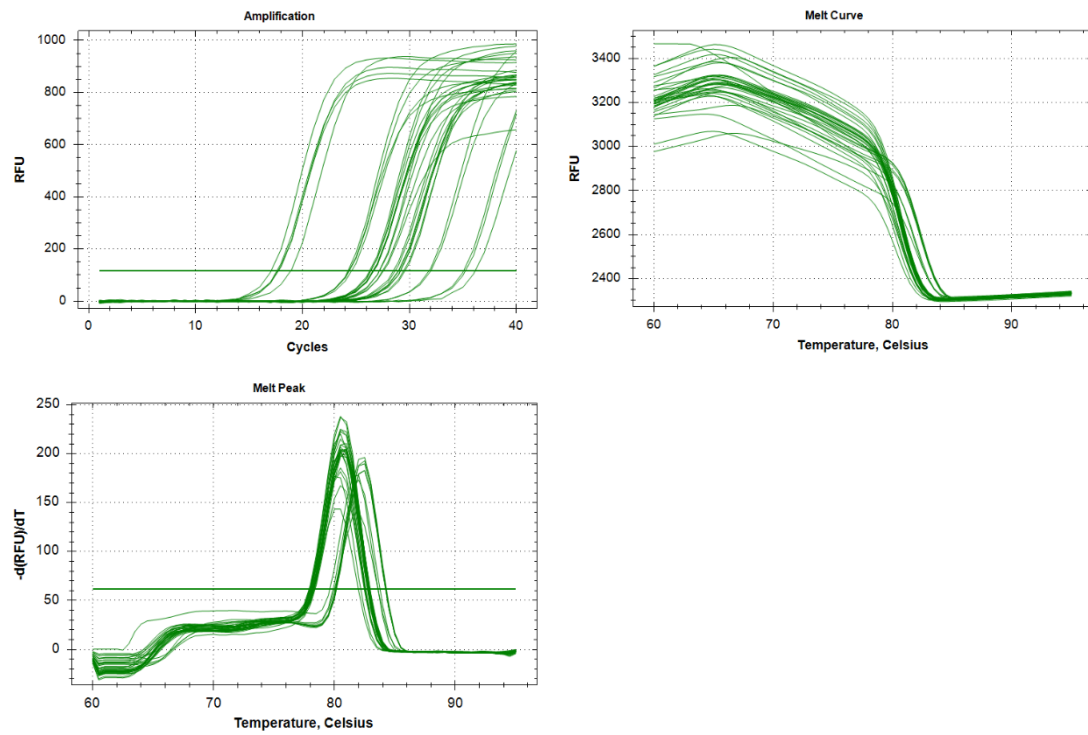

**Figure S1.** The amplification, melt curve and melt peak of RT-qPCR

Supplement: s1 [file s1 › Figure S1.pdf]
